# Supplementary material for: Intronic Non-CG DNA hydroxymethylation and alternative mRNA splicing in honey bees
Source: PubMed Central journal article supplement (PMC3850688; doi:10.1186/1471-2164-14-666), 2013-09-30
Supplement: 1471-2164-14-666-S2.pdf [file 1471-2164-14-666-S2.pdf]

## Supplementary Tables

Table S1. BS-Miner analyses of data from Lyko *et al.* (2010).

Table S2. Bismark analysis of data from Lyko *et al.* (2010).

Table S3. Cytosine DNA methylation in EHB and AHB in CG, CHG, and GHH genomic contexts.

Table S4. Housekeeping genes have the most CpG DNA methylation.

Table S5. AHB and EHB genes with methylated splice junctions.

Table S6. Differential CHH methylation is enriched in the introns of neuronal genes.

|                         |                      |                  |                |                  |                |                  |                |
|-------------------------|----------------------|------------------|----------------|------------------|----------------|------------------|----------------|
| <b>Data</b>             | Ryszard              |                  |                |                  |                |                  |                |
| <b>Analysis</b>         | BS-Miner             |                  |                |                  |                |                  |                |
| <b>Sample</b>           | SRR039815            |                  |                |                  |                |                  |                |
| <b>Methylation type</b> | CpG                  |                  | CHH            |                  | CHG            |                  |                |
|                         | <b>Region</b>        | <b>Count CpG</b> | <b>Percent</b> | <b>Count CHH</b> | <b>Percent</b> | <b>Count CHG</b> | <b>Percent</b> |
|                         | DOWNSTREAM           | 97,300           | 29.05%         | 92,823           | 14.05%         | 3,561            | 15.81%         |
|                         | EXON                 | 100,930          | 30.13%         | 17,150           | 2.60%          | 1,181            | 5.24%          |
|                         | INTERGENIC           | 18,652           | 5.57%          | 259,923          | 39.34%         | 8,009            | 35.56%         |
|                         | INTRAGENIC           |                  |                |                  |                |                  |                |
|                         | INTRON               | 24,967           | 7.45%          | 205,544          | 31.11%         | 6,390            | 28.37%         |
|                         | SPLICE_SITE_ACCEPTOR |                  |                | 217              | 0.03%          | 54               | 0.24%          |
|                         | SPLICE_SITE_DONOR    | 359              | 0.11%          | 245              | 0.04%          | 8                | 0.04%          |
|                         | UPSTREAM             | 92,741           | 27.69%         | 84,837           | 12.84%         | 3,321            | 14.74%         |
|                         | <b>Total</b>         | <b>334,949</b>   |                | <b>660,739</b>   |                | <b>22,524</b>    |                |
|                         | <b>Percent</b>       | <b>33%</b>       |                | <b>65%</b>       |                | <b>2%</b>        |                |

Table S1. BS-Miner analyses of data from Lyko *et al.* (2010).

|                         |                  |                |                  |                |                  |                |
|-------------------------|------------------|----------------|------------------|----------------|------------------|----------------|
| <b>Data</b>             | Ryszard          |                |                  |                |                  |                |
| <b>Analysis</b>         | Bismark          |                |                  |                |                  |                |
| <b>Sample</b>           | SRR039815        |                |                  |                |                  |                |
| <b>Methylation type</b> | CpG              |                | CHH              |                | CHG              |                |
| <b>Region</b>           | <b>Count CpG</b> | <b>Percent</b> | <b>Count CHH</b> | <b>Percent</b> | <b>Count CHG</b> | <b>Percent</b> |
| DOWNSTREAM              | 125,846          | 23.30%         | 57,536           | 12.96%         | 8,737            | 12.09%         |
| EXON                    | 132,953          | 24.61%         | 27,882           | 6.28%          | 8,972            | 12.41%         |
| INTERGENIC              | 78,899           | 14.61%         | 168,454          | 37.95%         | 24,219           | 33.50%         |
| INTRAGENIC              | 20               | 0.00%          | 1                | 0%             |                  |                |
| INTRON                  | 80,428           | 14.89%         | 135,288          | 30.48%         | 20,735           | 28.68%         |
| SPLICE_SITE_ACCEPTOR    | 1                | 0%             | 77               | 0.02%          | 90               | 0.12%          |
| SPLICE_SITE_DONOR       | 395              | 0.07%          | 125              | 0.03%          | 28               | 0.04%          |
| UPSTREAM                | 121,666          | 22.52%         | 54,486           | 12.28%         | 9,518            | 13.17%         |
| <b>Total</b>            | <b>540,208</b>   |                | <b>443,849</b>   |                | <b>72,299</b>    |                |
| <b>Percent</b>          | <b>51%</b>       |                | <b>42%</b>       |                | <b>7%</b>        |                |

Table S2. Bismark analysis of data from Lyko *et al.* (2010).

| Type (alphabetical order) AHB_CpG | Analyzed  | Methylated | Methylated % |
|-----------------------------------|-----------|------------|--------------|
| <b>Cds</b>                        | 1,273,706 | 40,288     | 3.163%       |
| <b>Downstream</b>                 | 2,086,041 | 37,798     | 1.812%       |
| <b>Exon</b>                       | 1,273,706 | 40,288     | 3.163%       |
| <b>Gene</b>                       | 7,105,672 | 62,011     | 0.873%       |
| <b>Intergenic</b>                 | 9,767,537 | 35,409     | 0.363%       |
| <b>Intron</b>                     | 5,887,038 | 22,463     | 0.382%       |
| <b>SpliceSiteAcceptor</b>         | 14        | 1          | 7.143%       |
| <b>SpliceSiteDonor</b>            | 2,257     | 81         | 3.589%       |
| <b>Transcript</b>                 | 7,806,591 | 64,990     | 0.833%       |
| <b>Upstream</b>                   | 2,294,855 | 38,169     | 1.663%       |

| Type (alphabetical order) EHB_CpG | Analyzed   | Methylated | Methylated % |
|-----------------------------------|------------|------------|--------------|
| <b>Cds</b>                        | 1,318,533  | 82,558     | 6.261%       |
| <b>Downstream</b>                 | 2,255,737  | 89,512     | 3.968%       |
| <b>Exon</b>                       | 1,318,533  | 82,558     | 6.261%       |
| <b>Gene</b>                       | 7,555,968  | 149,371    | 1.977%       |
| <b>Intergenic</b>                 | 10,471,326 | 111,682    | 1.067%       |
| <b>Intron</b>                     | 6,293,493  | 68,460     | 1.088%       |
| <b>SpliceSiteAcceptor</b>         | 18         | 1          | 5.556%       |
| <b>SpliceSiteDonor</b>            | 2,504      | 215        | 8.586%       |
| <b>Transcript</b>                 | 8,297,751  | 158,204    | 1.907%       |
| <b>Upstream</b>                   | 2,468,142  | 87,960     | 3.564%       |

Table S3a.

| Type (alphabetical order) AHB_CHH | Analyzed   | Methylated | Methylated % |
|-----------------------------------|------------|------------|--------------|
| <b>Cds</b>                        | 3,316,927  | 26,207     | 0.79%        |
| <b>Downstream</b>                 | 5,075,583  | 79,404     | 1.564%       |
| <b>Exon</b>                       | 3,316,927  | 26,207     | 0.79%        |
| <b>Gene</b>                       | 12,684,330 | 212,020    | 1.672%       |
| <b>Intergenic</b>                 | 16,317,387 | 325,139    | 1.993%       |
| <b>Intron</b>                     | 9,480,307  | 186,385    | 1.966%       |
| <b>SpliceSiteAcceptor</b>         | 14,774     | 87         | 0.589%       |
| <b>SpliceSiteDonor</b>            | 26,957     | 121        | 0.449%       |
| <b>Transcript</b>                 | 13,795,281 | 234,094    | 1.697%       |
| <b>Upstream</b>                   | 5,213,214  | 74,112     | 1.422%       |

| Type (alphabetical order) EHB_CHH | Analyzed   | Methylated | Methylated % |
|-----------------------------------|------------|------------|--------------|
| <b>Cds</b>                        | 3,648,122  | 85,111     | 2.333%       |
| <b>Downstream</b>                 | 5,967,723  | 216,950    | 3.635%       |
| <b>Exon</b>                       | 3,648,122  | 85,111     | 2.333%       |
| <b>Gene</b>                       | 14,525,454 | 521,600    | 3.591%       |
| <b>Intergenic</b>                 | 19,011,050 | 773,971    | 4.071%       |
| <b>Intron</b>                     | 10,997,021 | 438,582    | 3.988%       |
| <b>SpliceSiteAcceptor</b>         | 17,187     | 538        | 3.13%        |
| <b>SpliceSiteDonor</b>            | 34,121     | 620        | 1.817%       |
| <b>Transcript</b>                 | 15,784,142 | 570,790    | 3.616%       |
| <b>Upstream</b>                   | 6,096,005  | 211,100    | 3.463%       |

Table S3b.

| Type (alphabetical order) AHB_CHG | Analyzed  | Methylated | Methylated % |
|-----------------------------------|-----------|------------|--------------|
| <b>Cds</b>                        | 1,002,706 | 3,493      | 0.348%       |
| <b>Downstream</b>                 | 1,119,219 | 4,559      | 0.407%       |
| <b>Exon</b>                       | 1,002,706 | 3,493      | 0.348%       |
| <b>Gene</b>                       | 3,188,727 | 11,619     | 0.364%       |
| <b>Intergenic</b>                 | 3,777,833 | 14,009     | 0.371%       |
| <b>Intron</b>                     | 2,225,532 | 8,217      | 0.369%       |
| <b>SpliceSiteAcceptor</b>         | 16,858    | 43         | 0.255%       |
| <b>SpliceSiteDonor</b>            | 4,407     | 15         | 0.34%        |
| <b>Transcript</b>                 | 3,470,589 | 12,577     | 0.362%       |
| <b>Upstream</b>                   | 1,189,498 | 4,526      | 0.38%        |

| Type (alphabetical order) EHB_CHG | Analyzed  | Methylated | Methylated % |
|-----------------------------------|-----------|------------|--------------|
| <b>Cds</b>                        | 1,059,063 | 11,898     | 1.123%       |
| <b>Downstream</b>                 | 1,242,115 | 16,772     | 1.35%        |
| <b>Exon</b>                       | 1,059,063 | 11,898     | 1.123%       |
| <b>Gene</b>                       | 3,419,998 | 37,559     | 1.098%       |
| <b>Intergenic</b>                 | 4,099,352 | 45,117     | 1.101%       |
| <b>Intron</b>                     | 2,401,495 | 25,966     | 1.081%       |
| <b>SpliceSiteAcceptor</b>         | 18,474    | 257        | 1.391%       |
| <b>SpliceSiteDonor</b>            | 5,072     | 57         | 1.124%       |
| <b>Transcript</b>                 | 3,718,898 | 40,695     | 1.094%       |
| <b>Upstream</b>                   | 1,308,187 | 16,511     | 1.262%       |

Table S3c. Distribution of CpG, CHH, and CHG DNA methylation.

| EHB_>90%_CpG_514 genes                |       |          |            |          |           |                 |          |          |
|---------------------------------------|-------|----------|------------|----------|-----------|-----------------|----------|----------|
| GO                                    | Count | %        | List Total | Pop Hits | Pop Total | Fold Enrichment | PValue   | FDR      |
| mitochondrion                         | 43    | 11.40584 | 164        | 571      | 4786      | 2.197663        | 5.85E-07 | 7.58E-04 |
| ribosomal protein                     | 17    | 4.509284 | 367        | 157      | 12980     | 3.82964         | 9.13E-06 | 0.011197 |
|                                       |       |          |            |          |           |                 |          |          |
| AHB_>90%_CpG_160 genes                |       |          |            |          |           |                 |          |          |
| GO                                    |       |          |            |          |           |                 |          |          |
| gtp-binding                           | 15    | 7.8125   | 190        | 152      | 12980     | 6.74169         | 4.47E-08 | 5.14E-05 |
| establishment of protein localization | 17    | 8.854167 | 117        | 285      | 7937      | 4.046454        | 3.41E-06 | 0.005281 |

Table S4. Housekeeping genes have the most CpG DNA methylation. As found previously, the genes with high o/e ratios are primarily housekeeping genes (1-3) (Table S2). By ‘housekeeping’ genes, we mean genes that encode proteins with a higher degree of conservation than proteins encoded by non-methylated genes (4). Highly conserved genes are utilized in most tissues, whereas less conserved genes are typically expressed in specialized tissues. Examples are the genes coding for odorant-binding proteins or odorant receptors (5), which are not methylated (not shown, see also (3)).

| Term_AHB             | Count | %        | PValue   | List Total | Pop Hits | Pop Total | Fold Enrichment | FDR      |
|----------------------|-------|----------|----------|------------|----------|-----------|-----------------|----------|
| phosphoprotein       | 45    | 21.32701 | 3.49E-13 | 206        | 815      | 12980     | 3.479064        | 4.27E-10 |
| alternative splicing | 25    | 11.84834 | 4.02E-05 | 206        | 616      | 12980     | 2.557212        | 0.049222 |

Table S5a. AHB genes with methylation splice junctions.



| Term_EHB                                 | Count | %        | PValue   | List Total | Pop Hits | Pop Total | Fold Enrichment | FDR      |
|------------------------------------------|-------|----------|----------|------------|----------|-----------|-----------------|----------|
| phosphoprotein                           | 109   | 12.80846 | 9.10E-14 | 827        | 815      | 12980     | 2.099124        | 1.20E-10 |
| GO:0001882~nucleoside binding            | 111   | 13.04348 | 1.35E-10 | 585        | 824      | 7918      | 1.823289        | 2.05E-07 |
| nucleotide-binding                       | 93    | 10.92832 | 3.20E-10 | 827        | 743      | 12980     | 1.964551        | 4.23E-07 |
| GO:0001883~purine nucleoside binding     | 109   | 12.80846 | 3.64E-10 | 585        | 817      | 7918      | 1.805777        | 5.56E-07 |
| GO:0030554~adenyl nucleotide binding     | 108   | 12.69095 | 5.55E-10 | 585        | 812      | 7918      | 1.800227        | 8.46E-07 |
| atp-binding                              | 78    | 9.165687 | 6.23E-10 | 827        | 585      | 12980     | 2.092705        | 8.25E-07 |
| GO:0017076~purine nucleotide binding     | 123   | 14.45358 | 1.84E-09 | 585        | 989      | 7918      | 1.683327        | 2.80E-06 |
| GO:0000166~nucleotide binding            | 142   | 16.68625 | 2.92E-09 | 585        | 1206     | 7918      | 1.593678        | 4.45E-06 |
| GO:0005524~ATP binding                   | 98    | 11.51586 | 9.75E-09 | 585        | 748      | 7918      | 1.773308        | 1.49E-05 |
| GO:0032559~adenyl ribonucleotide binding | 98    | 11.51586 | 1.13E-08 | 585        | 750      | 7918      | 1.768579        | 1.72E-05 |
| GO:0032555~purine ribonucleotide binding | 112   | 13.16099 | 5.03E-08 | 585        | 923      | 7918      | 1.642389        | 7.67E-05 |
| GO:0032553~ribonucleotide binding        | 112   | 13.16099 | 5.03E-08 | 585        | 923      | 7918      | 1.642389        | 7.67E-05 |
| cytoplasm                                | 52    | 6.110458 | 1.71E-05 | 827        | 436      | 12980     | 1.871915        | 0.022614 |
| alternative splicing                     | 66    | 7.755582 | 3.52E-05 | 827        | 616      | 12980     | 1.681638        | 0.046545 |

Table S5b. EHB genes with methylated splice junctions.

| chh_Intron M-EHB / M-AHB |           |          |                |               |      |                                                    |
|--------------------------|-----------|----------|----------------|---------------|------|----------------------------------------------------|
|                          | Iteration | p-value  | p-value<br>adj | Latest result | Size | Description                                        |
|                          | 1         | 6.95E-17 | 5.19E-13       | GO:0001071    | 395  | nucleic acid binding transcription factor activity |
|                          | 2         | 4.20E-23 | 2.34E-15       | GO:0044459    | 369  | plasma membrane part                               |
|                          | 3         | 1.87E-27 | 7.80E-16       | GO:0009605    | 363  | response to external stimulus                      |
|                          | 4         | 3.21E-30 | 9.98E-15       | GO:0031012    | 37   | extracellular matrix                               |
|                          | 5         | 6.39E-33 | 1.48E-13       | GO:0022838    | 197  | substrate-specific channel activity                |
|                          | 6         | 2.54E-35 | 4.39E-12       | GO:0005576    | 370  | extracellular region                               |
|                          | 7         | 2.01E-37 | 2.59E-10       | GO:0005085    | 60   | guanyl-nucleotide exchange factor activity         |
|                          | 8         | 1.65E-39 | 1.59E-08       | GO:0006887    | 35   | exocytosis                                         |
|                          | 9         | 1.31E-41 | 9.38E-07       | GO:0030594    | 53   | neurotransmitter receptor activity                 |
|                          | 10        | 1.84E-43 | 9.84E-05       | GO:0044449    | 32   | contractile fiber part                             |

Table S6. Differential CHH methylation is primarily in the introns of neuronal genes.
